# Supplementary material for: Structural Characterization of Polysaccharides from Dendrobium officinale and Their Effects on Apoptosis of HeLa Cell Line
Source: MDPI journal article supplement (doi:10.3390/molecules23102484), 2018-09-27
Supplement: s1 [file s1]

## Supplement Data

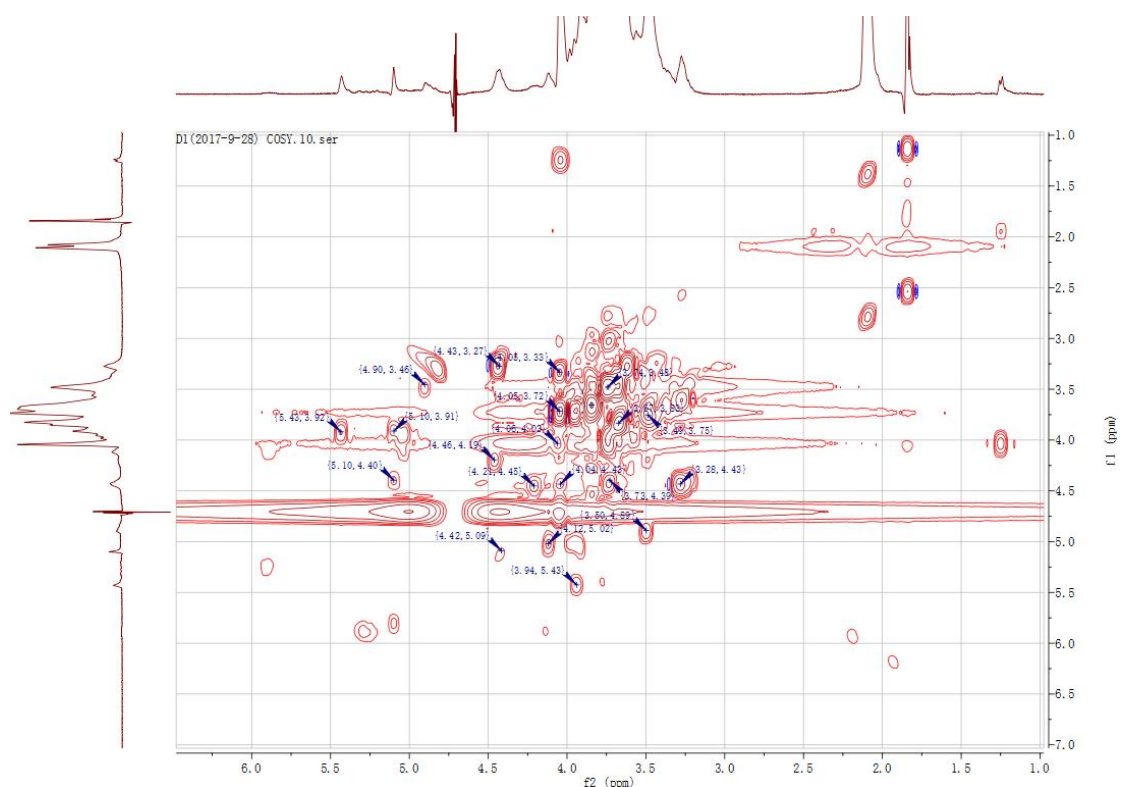

Figure S1 The  $^1\text{H}$ - $^1\text{H}$  COSY of DWDOP1

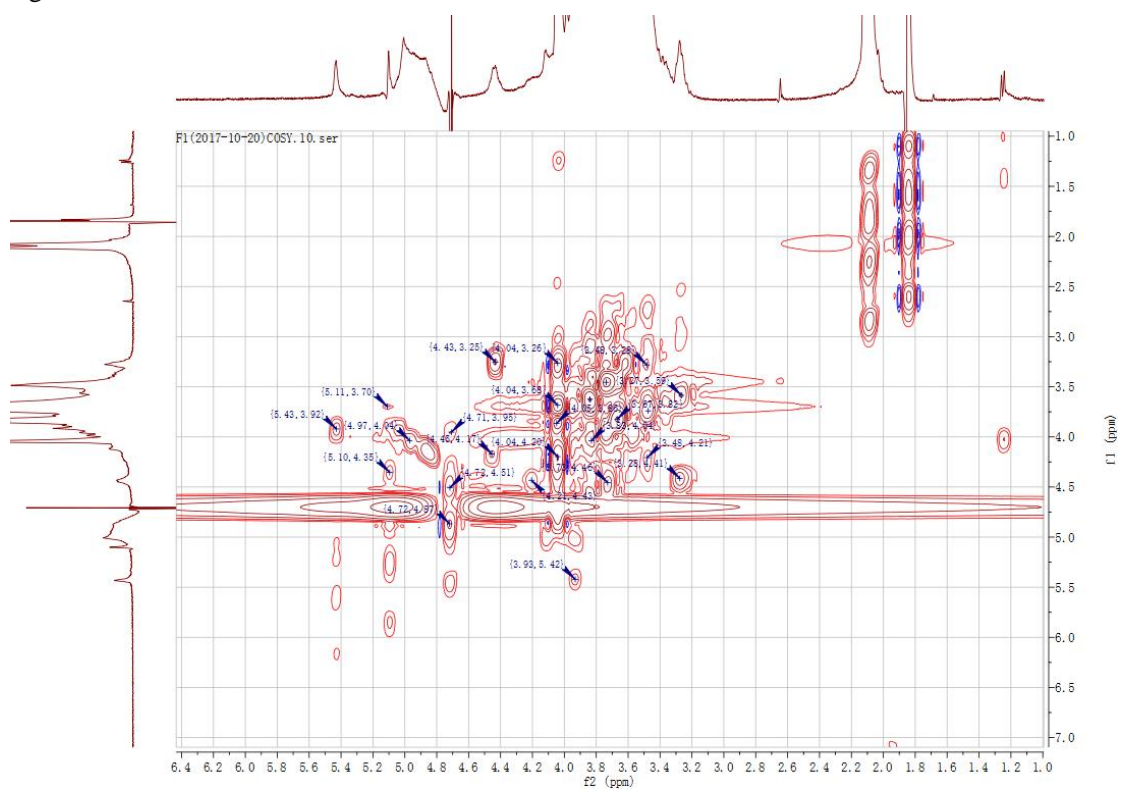

Figure S2 The  $^1\text{H}$ - $^1\text{H}$  COSY of FWDOP1

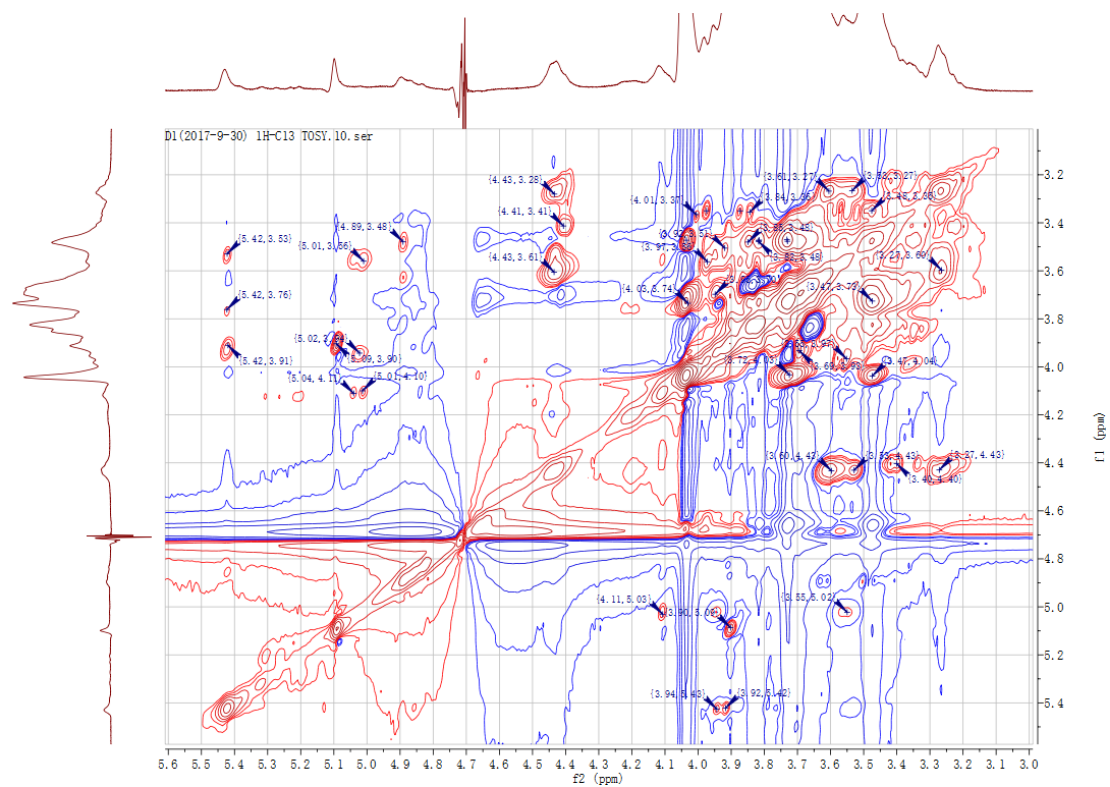

Figure S3 The TOCSY of DWDOP1

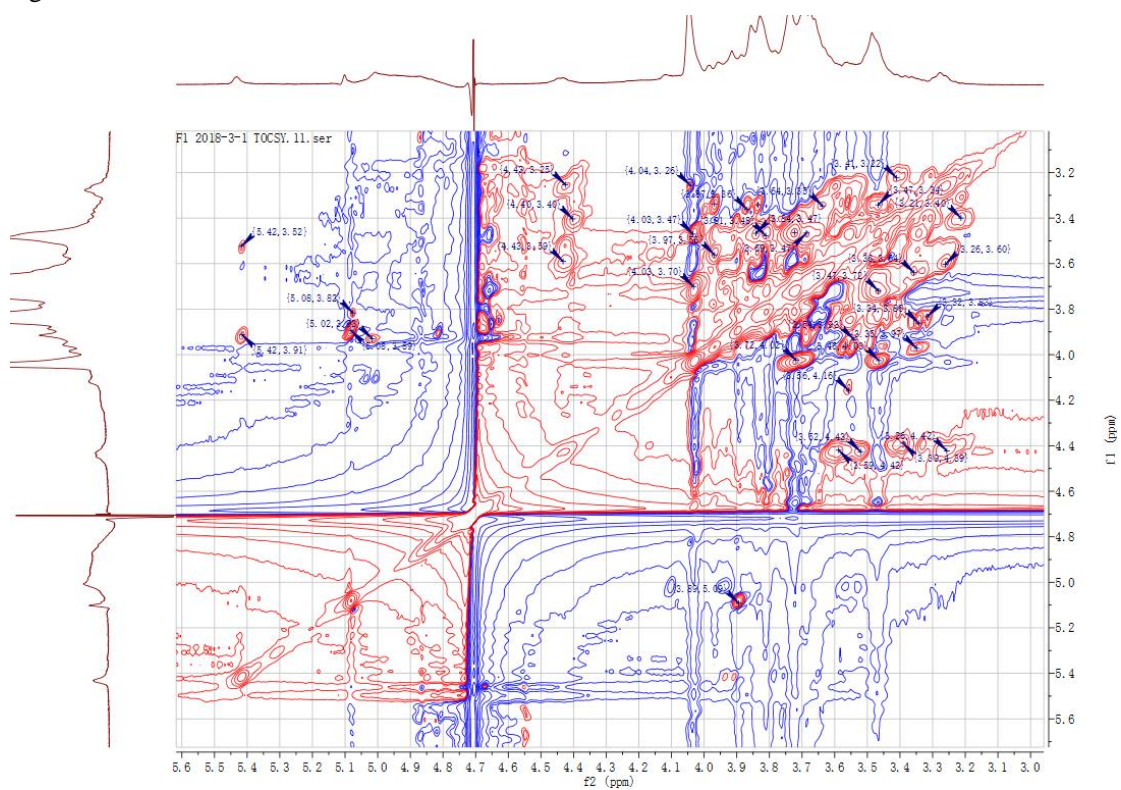

Figure 4S The TOCSY of FWDOP1

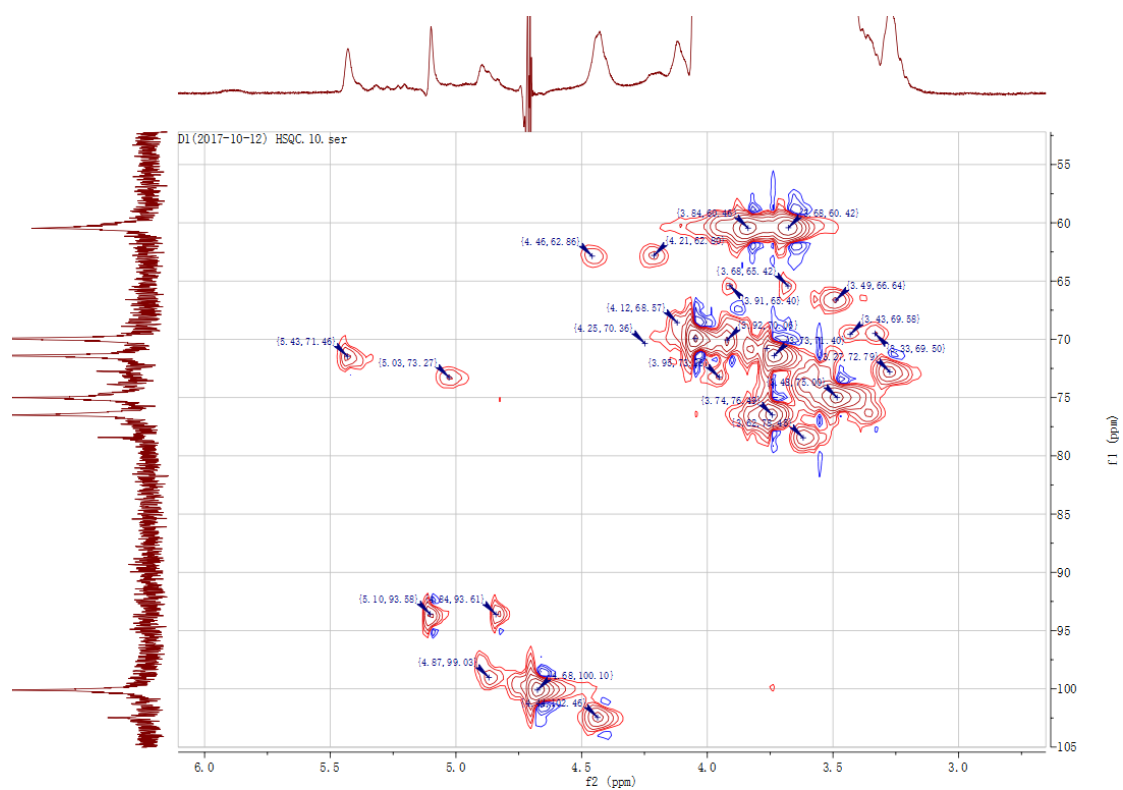

Figure 5S The  $^1\text{H}$ - $^{13}\text{C}$  HSQC of DWDOPI

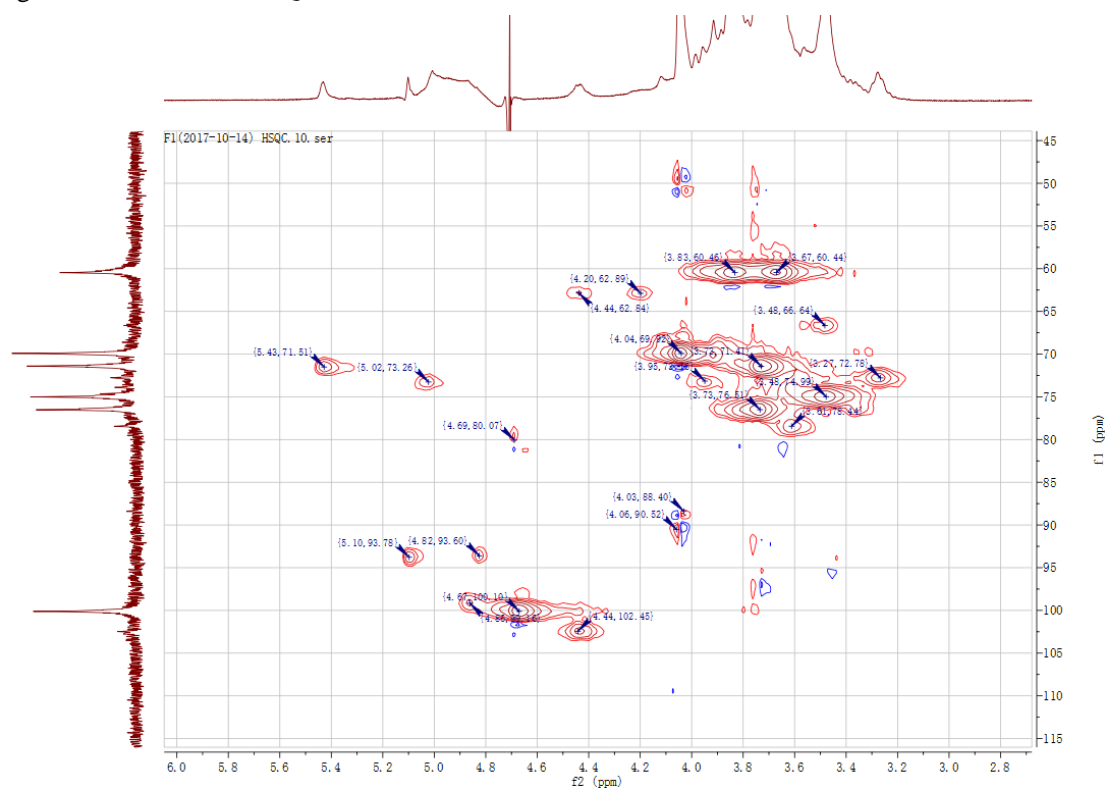

Figure 6S The  $^1\text{H}$ - $^{13}\text{C}$  HSQC of FWDOP1

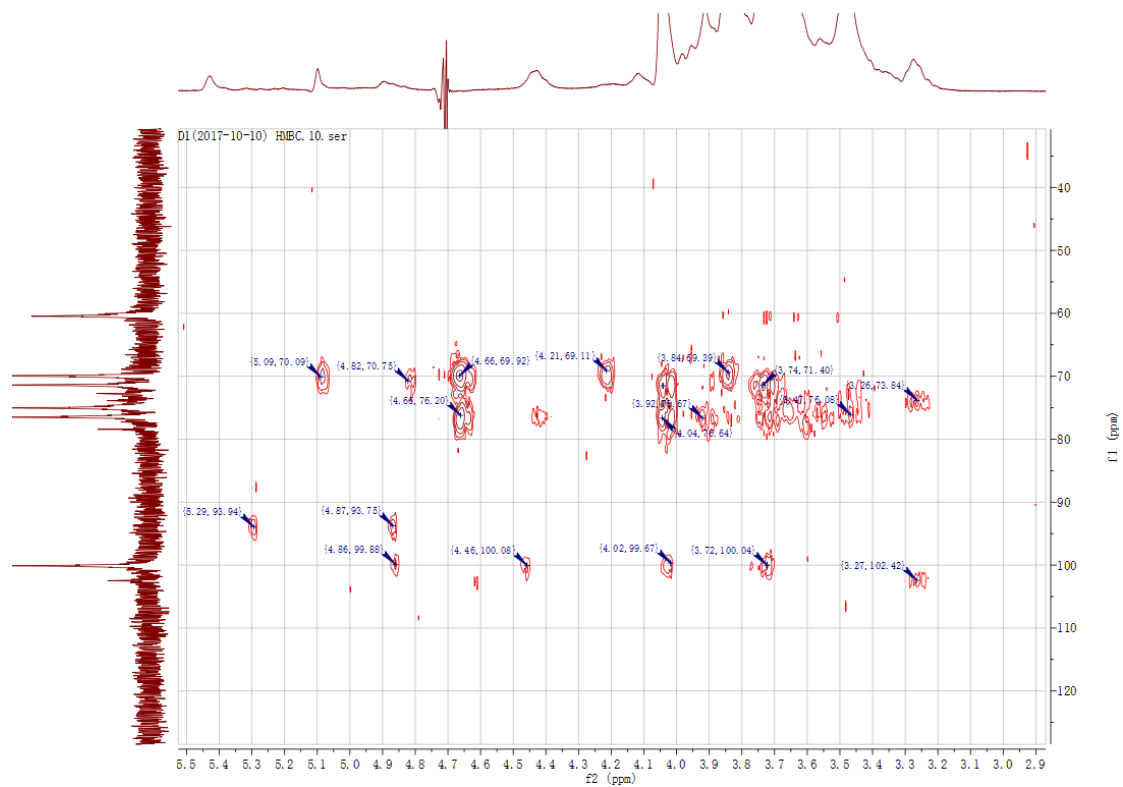

Figure 7S The  $^1\text{H}$ - $^{13}\text{C}$  HMBC of DWDOP1

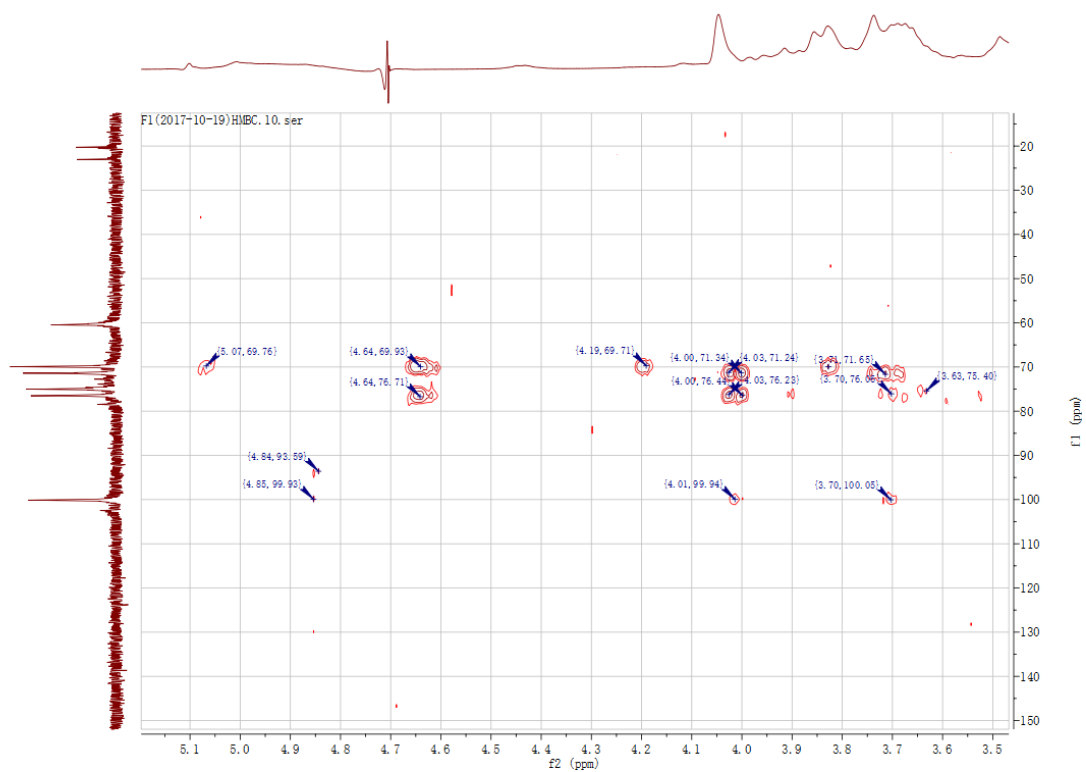

Figure 8S The  $^1\text{H}$ - $^{13}\text{C}$  HMBC of FWDOP1
